# Supplementary material
Source: publisher figshare collection journal article supplement (https://acs.figshare.com/ndownloader/files/4170130)
Supplement: Supplementary file 1 [file 4170130]

## **Supporting Information**

### **Identification of particulate matter sources in a wood burning community on an hourly time-scale**

Travis Ancelet<sup>a,b\*</sup>, Perry K. Davy<sup>a</sup>, William J. Trompetter<sup>a</sup>, Andreas Markwitz<sup>a</sup> and David C. Weatherburn<sup>b</sup>

<sup>a</sup> GNS Science, 30 Gracefield Road, PO Box 31312, Lower Hutt, New Zealand

<sup>b</sup> School of Chemical and Physical Sciences, Victoria University of Wellington, PO Box 600, Wellington, New Zealand

\* Corresponding author. Tel.: +64-4-570 4668; fax: +64-4-570 4657. E-mail address: t.ancelet@gns.cri.nz

This supporting information contains nine pages featuring three tables and eight figures.

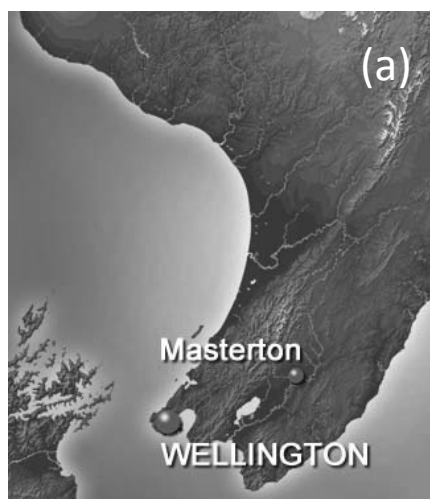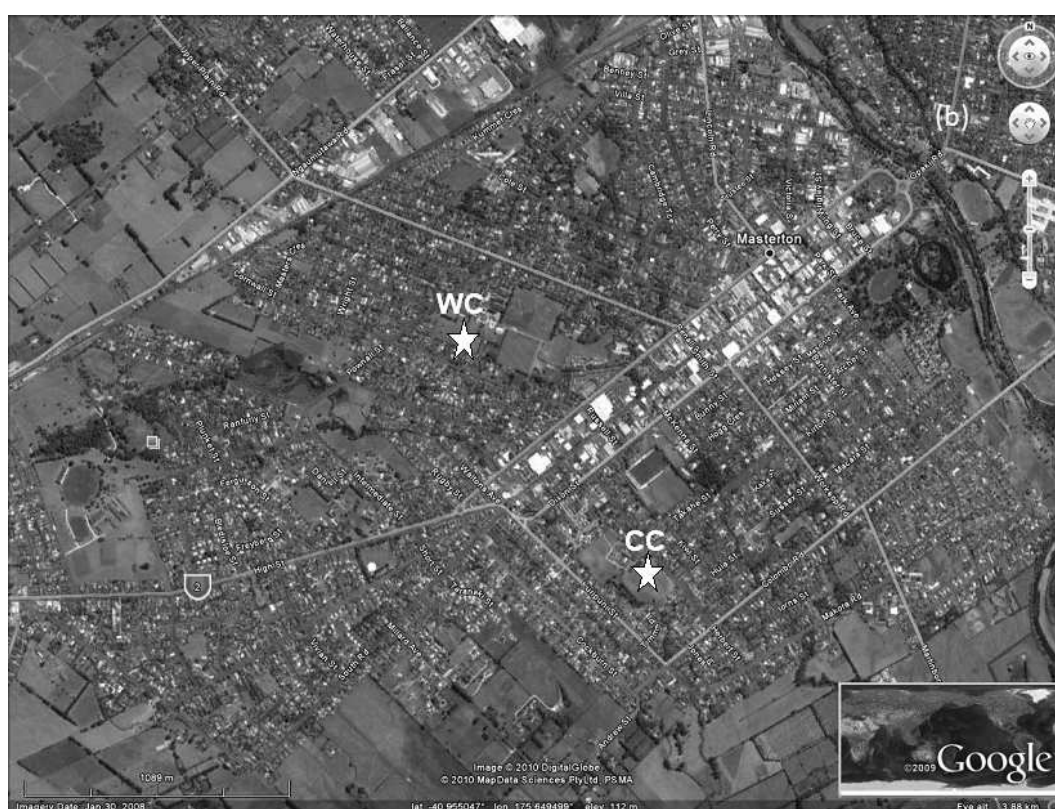

**Figure S1.** Location of Masterton (a) and locations of the sampling sites (indicated by stars) within Masterton (b)

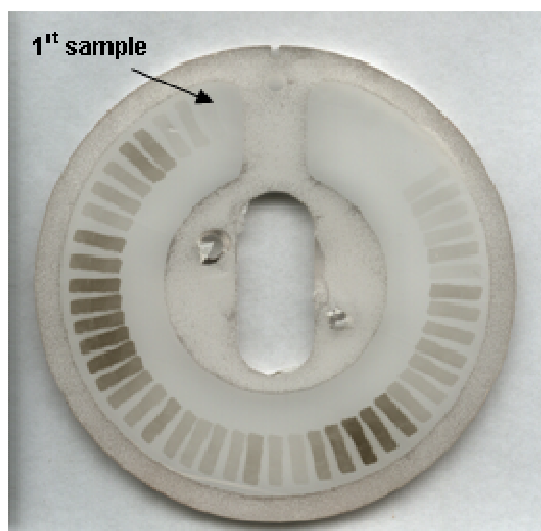

**Figure S2.** Streaker sampler filter showing individual hourly samples (dark bands)

**Table S1.** Parameters used for PMF analyses and diagnostics obtained from the analyses for Wairarapa College and Chanel College

|                                                             | Wairarapa College | Chanel College |
|-------------------------------------------------------------|-------------------|----------------|
| Extra modeling uncertainty (%)                              | 15                | 15             |
| Number of base runs                                         | 20                | 20             |
| Base run seed                                               | Random            | Random         |
| Number of bootstraps                                        | 200               | 200            |
| Minimum correlation R-value                                 | 0.6               | 0.6            |
| Bootstrap seed                                              | Random            | Random         |
| Block size                                                  | 24                | 24             |
| Theoretical Q <sup>a</sup>                                  | 7613              | 8806           |
| Robust Q                                                    | 6097              | 5900           |
| True Q                                                      | 6098              | 5901           |
| Number of bootstrapped factors mapped to original factor 1  | 200               | 200            |
| Number of bootstrapped factors mapped to original factor 2  | 200               | 197            |
| Number of bootstrapped factors mapped to original factor 3  | 200               | 200            |
| Number of bootstrapped factors mapped to original factor 4  | 199               | 200            |
| Number of bootstrapped factors mapped to no original factor | 1                 | 2              |
| Maximum D value <sup>b</sup>                                | 0.4               | 0.6            |

<sup>a</sup> Calculated based on the method reported by Paatero *et al.* (1)

<sup>b</sup> From the matrix containing the sum of squares between paired residuals (2)

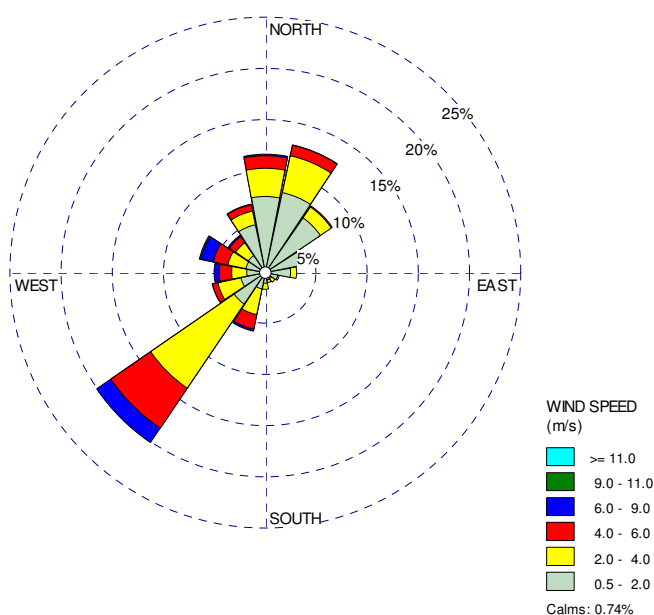

**Figure S3.** Wind rose plot over the entire sampling period from the Wairarapa College site. The radial dimensions indicate the frequency (%) of winds from each direction.

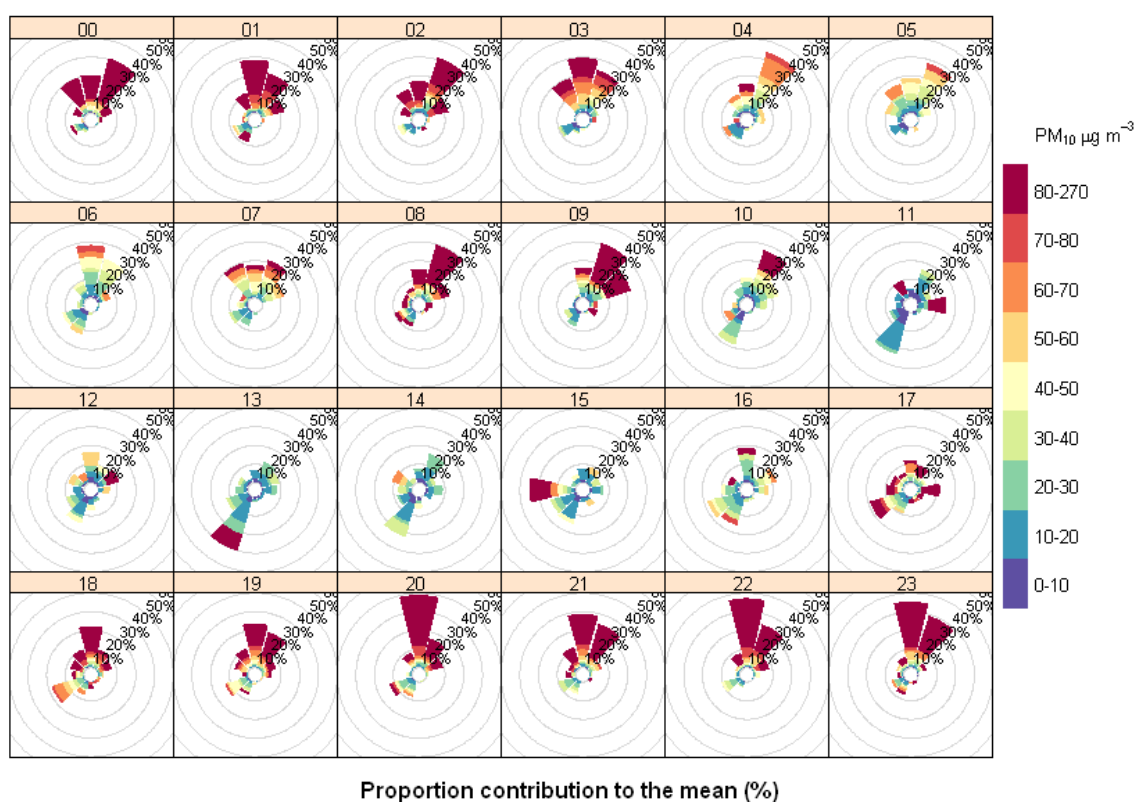

**Figure S4.** Hourly pollution roses from the Chanel College site (produced using the Openair package (Carlslaw and Ropkins, 2011)) indicating wind directions contributing the most to average hourly PM<sub>10</sub> concentrations. The radial dimensions

indicate the percentage of the total pollution that arrives from each wind sector during each one-hour period.

**Table S2.** PM<sub>10</sub> (µg m<sup>-3</sup>), BC (ng m<sup>-3</sup>) and elemental (ng m<sup>-3</sup>) data from the Wairarapa College site

|                  | Average | Maximum | Minimum | Median | Standard Deviation | Average Uncertainty | Average LOD | Number > LOD |
|------------------|---------|---------|---------|--------|--------------------|---------------------|-------------|--------------|
| PM <sub>10</sub> | 25      | 213     | 0       | 14     | 30                 |                     |             |              |
| Fine BC          | 3144    | 21652   | 157     | 1566   | 3797               | 611                 | 800         | 552          |
| Fine S           | 234     | 1549    | 97      | 210    | 129                | 32                  | 28          | 571          |
| Fine K           | 231     | 2036    | 0       | 117    | 273                | 113                 | 27          | 565          |
| Fine Ca          | 104     | 770     | 0       | 81     | 91                 | 109                 | 24          | 565          |
| Fine Fe          | 38      | 376     | 0       | 29     | 35                 | 115                 | 9           | 553          |
| Fine As          | 7       | 91      | 0       | 0      | 15                 | 108                 | 35          | 41           |
| Coarse Na        | 1544    | 57044   | 0       | 718    | 2779               | 283                 | 567         | 466          |
| Coarse Al        | 375     | 17901   | 0       | 71     | 1578               | 340                 | 77          | 374          |
| Coarse Si        | 475     | 9453    | 121     | 302    | 638                | 31                  | 51          | 571          |
| Coarse S         | 197     | 4767    | 0       | 101    | 303                | 150                 | 39          | 520          |
| Coarse Cl        | 1555    | 51507   | 0       | 386    | 2914               | 119                 | 36          | 571          |
| Coarse K         | 134     | 3099    | 0       | 83     | 179                | 157                 | 37          | 532          |
| Coarse Ca        | 764     | 25749   | 114     | 351    | 2468               | 25                  | 32          | 512          |
| Coarse Fe        | 137     | 7428    | 0       | 52     | 383                | 78                  | 18          | 539          |

**Table S3.** PM<sub>10</sub> (µg m<sup>-3</sup>), BC (ng m<sup>-3</sup>) and elemental (ng m<sup>-3</sup>) data from the Chanel College site

|                  | Average | Maximum | Minimum | Median | Standard Deviation | Average Uncertainty | Average LOD | Number > LOD |
|------------------|---------|---------|---------|--------|--------------------|---------------------|-------------|--------------|
| PM <sub>10</sub> | 32      | 484     | 0       | 19     | 39                 |                     |             |              |
| Fine BC          | 3716    | 20449   | 139     | 2011   | 4007               | 623                 | 800         | 631          |
| Fine S           | 236     | 645     | 106     | 228    | 71                 | 22                  | 37          | 680          |
| Fine K           | 148     | 891     | 0       | 82     | 163                | 15                  | 25          | 601          |
| Fine Ca          | 56      | 339     | 0       | 48     | 38                 | 21                  | 22          | 554          |
| Fine Fe          | 38      | 2774    | 0       | 22     | 152                | 11                  | 8           | 554          |
| Fine As          | 6       | 110     | 0       | 0      | 14                 | 31                  | 34          | 38           |
| Coarse Na        | 508     | 13098   | 0       | 300    | 713                | 294                 | 499         | 322          |
| Coarse Al        | 110     | 2297    | 25      | 81     | 163                | 36                  | 55          | 612          |
| Coarse Si        | 168     | 2498    | 62      | 113    | 190                | 32                  | 42          | 680          |
| Coarse S         | 71      | 1510    | 0       | 49     | 89                 | 34                  | 51          | 410          |
| Coarse Cl        | 643     | 17110   | 0       | 280    | 1046               | 57                  | 41          | 672          |
| Coarse K         | 42      | 1916    | 0       | 29     | 81                 | 21                  | 32          | 465          |
| Coarse Ca        | 164     | 5565    | 40      | 106    | 387                | 27                  | 28          | 680          |
| Coarse Fe        | 54      | 4172    | 0       | 14     | 232                | 14                  | 13          | 498          |

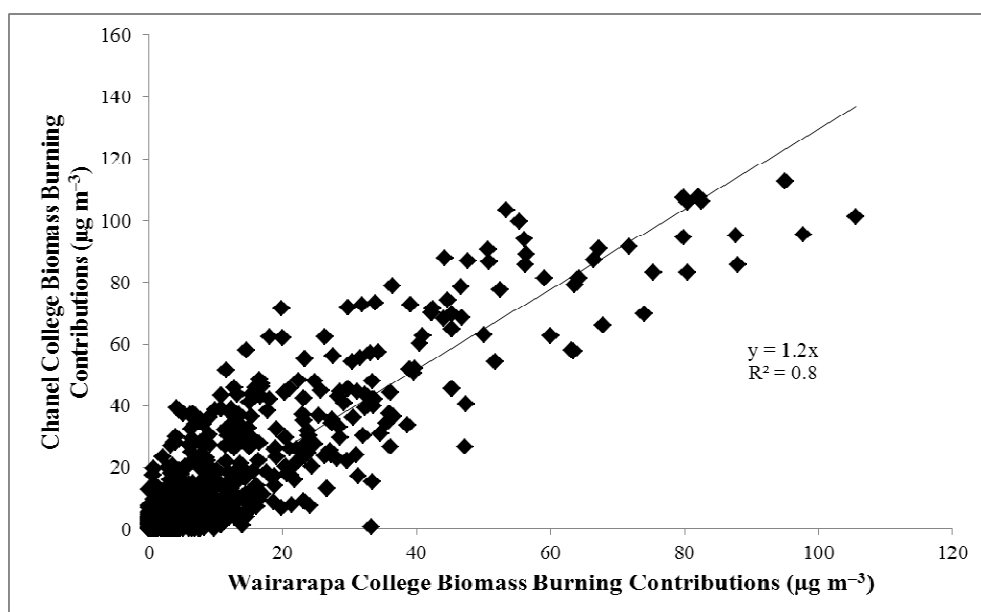

**Figure S5.** Plot of biomass burning contributions at Chanel College versus biomass burning contributions at Wairarapa College

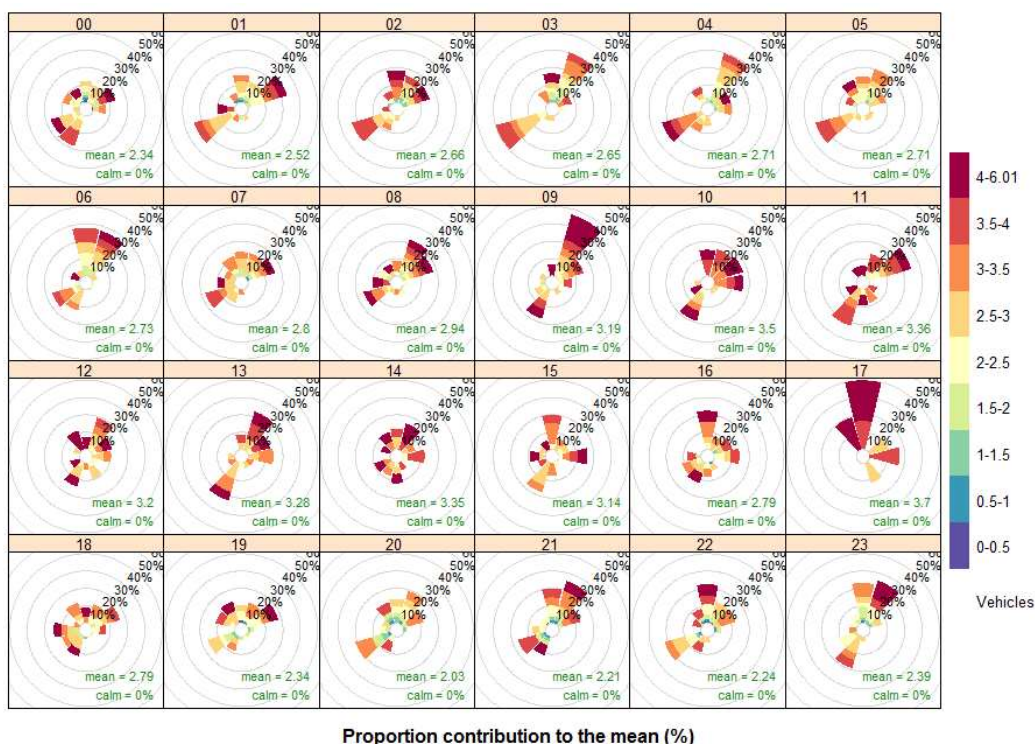

**Figure S6.** Hourly motor vehicle source roses from the Chanel College site indicating wind directions contributing the most to average hourly PM<sub>10</sub> concentrations. The radial dimensions indicate the percentage of the total motor vehicle contribution that arrives from each wind sector during each one-hour period.

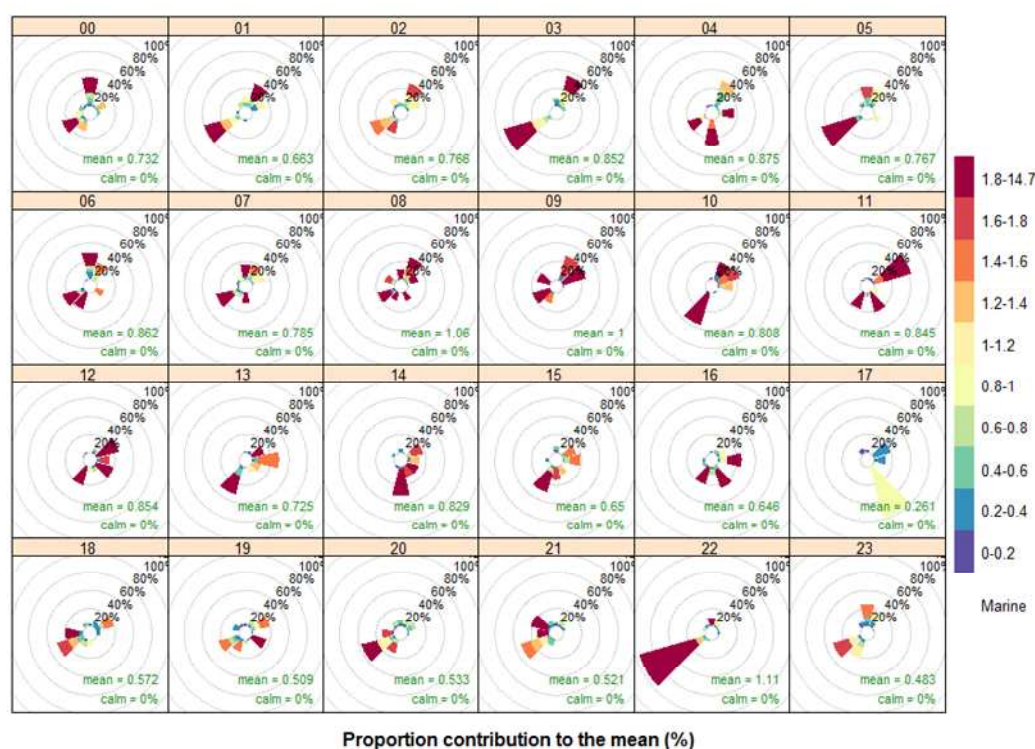

**Figure S7.** Hourly marine aerosol source roses from the Chanel College site indicating wind directions contributing the most to average hourly PM<sub>10</sub>

concentrations. The radial dimensions indicate the percentage of the total marine aerosol contribution that arrives from each wind sector during each one-hour period.

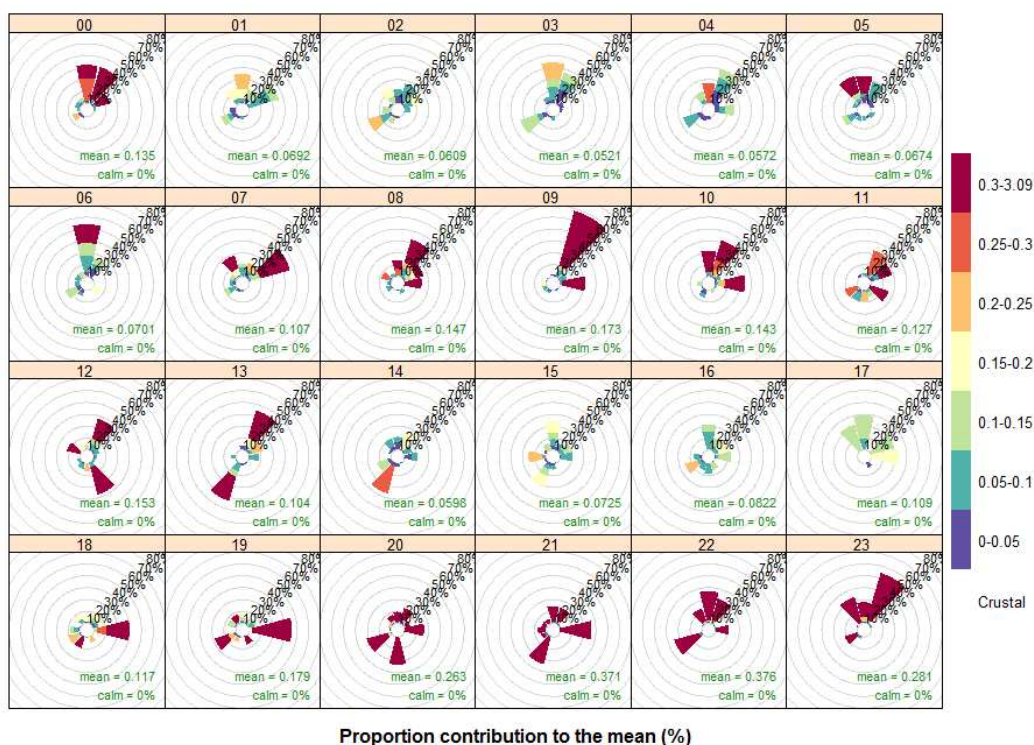

**Figure S8.** Hourly crustal matter source roses from the Chanel College site indicating wind directions contributing the most to average hourly PM<sub>10</sub> concentrations. The radial dimensions indicate the percentage of the total crustal matter contribution that arrives from each wind sector during each one-hour period.

## References

- (1) Paatero, P.; Hopke, P. K., Discarding or downweighting high-noise variables in factor analytic models. *Analytica Chimica Acta* 2003, 490, (1-2), 277-289.
- (2) *EPA Positive Matrix Factorization (PMF) 3.0 Fundamentals and User Guide*. USEPA National Exposure Research Laboratory, Research Triangle Park, NC, 2008.
